# Supplementary material for: Organic covalent modification to improve thermoelectric properties of TaS2
Source: PubMed Central journal article supplement (PMC9338255; doi:10.1038/s41467-022-32058-w), 2022-07-29
Supplement: 41467_2022_32058_MOESM3_ESM.pdf [file 41467_2022_32058_MOESM3_ESM.pdf]

## Lasing Reporting Summary

Nature Research wishes to improve the reproducibility of the work that we publish. This form is intended for publication with all accepted papers reporting claims of lasing and provides structure for consistency and transparency in reporting. Some list items might not apply to an individual manuscript, but all fields must be completed for clarity.

For further information on Nature Research policies, including our [data availability policy](#), see [Authors & Referees](#).

### ü Experimental design

**Please check: are the following details reported in the manuscript?**

#### 1. Threshold

Plots of device output power versus pump power over a wide range of values indicating a clear threshold  Yes not relevant  No

#### 2. Linewidth narrowing

Plots of spectral power density for the emission at pump powers below, around, and above the lasing threshold, indicating a clear linewidth narrowing at threshold  Yes not relevant  No

Resolution of the spectrometer used to make spectral measurements  Yes not relevant  No

#### 3. Coherent emission

Measurements of the coherence and/or polarization of the emission  Yes not relevant  No

#### 4. Beam spatial profile

Image and/or measurement of the spatial shape and profile of the emission, showing a well-defined beam above threshold  Yes not relevant  No

#### 5. Operating conditions

Description of the laser and pumping conditions  Yes not relevant  No  
*Continuous-wave, pulsed, temperature of operation*

Threshold values provided as density values (e.g. W cm<sup>-2</sup> or J cm<sup>-2</sup>) taking into account the area of the device  Yes not relevant  No

#### 6. Alternative explanations

Reasoning as to why alternative explanations have been ruled out as responsible for the emission characteristics  Yes not relevant  No  
*e.g. amplified spontaneous, directional scattering; modification of fluorescence spectrum by the cavity*

#### 7. Theoretical analysis

Theoretical analysis that ensures that the experimental values measured are realistic and reasonable  Yes not relevant  No  
*e.g. laser threshold, linewidth, cavity gain-loss, efficiency*

#### 8. Statistics

Number of devices fabricated and tested  Yes not relevant  No

Statistical analysis of the device performance and lifetime (time to failure)  Yes not relevant  No
